# Supplementary material
Source: Springer Nature journal article supplement (https://www.springermedizin.de/resource/supplementary/13053_2014_471_MOESM5_ESM.pdf/9673892)

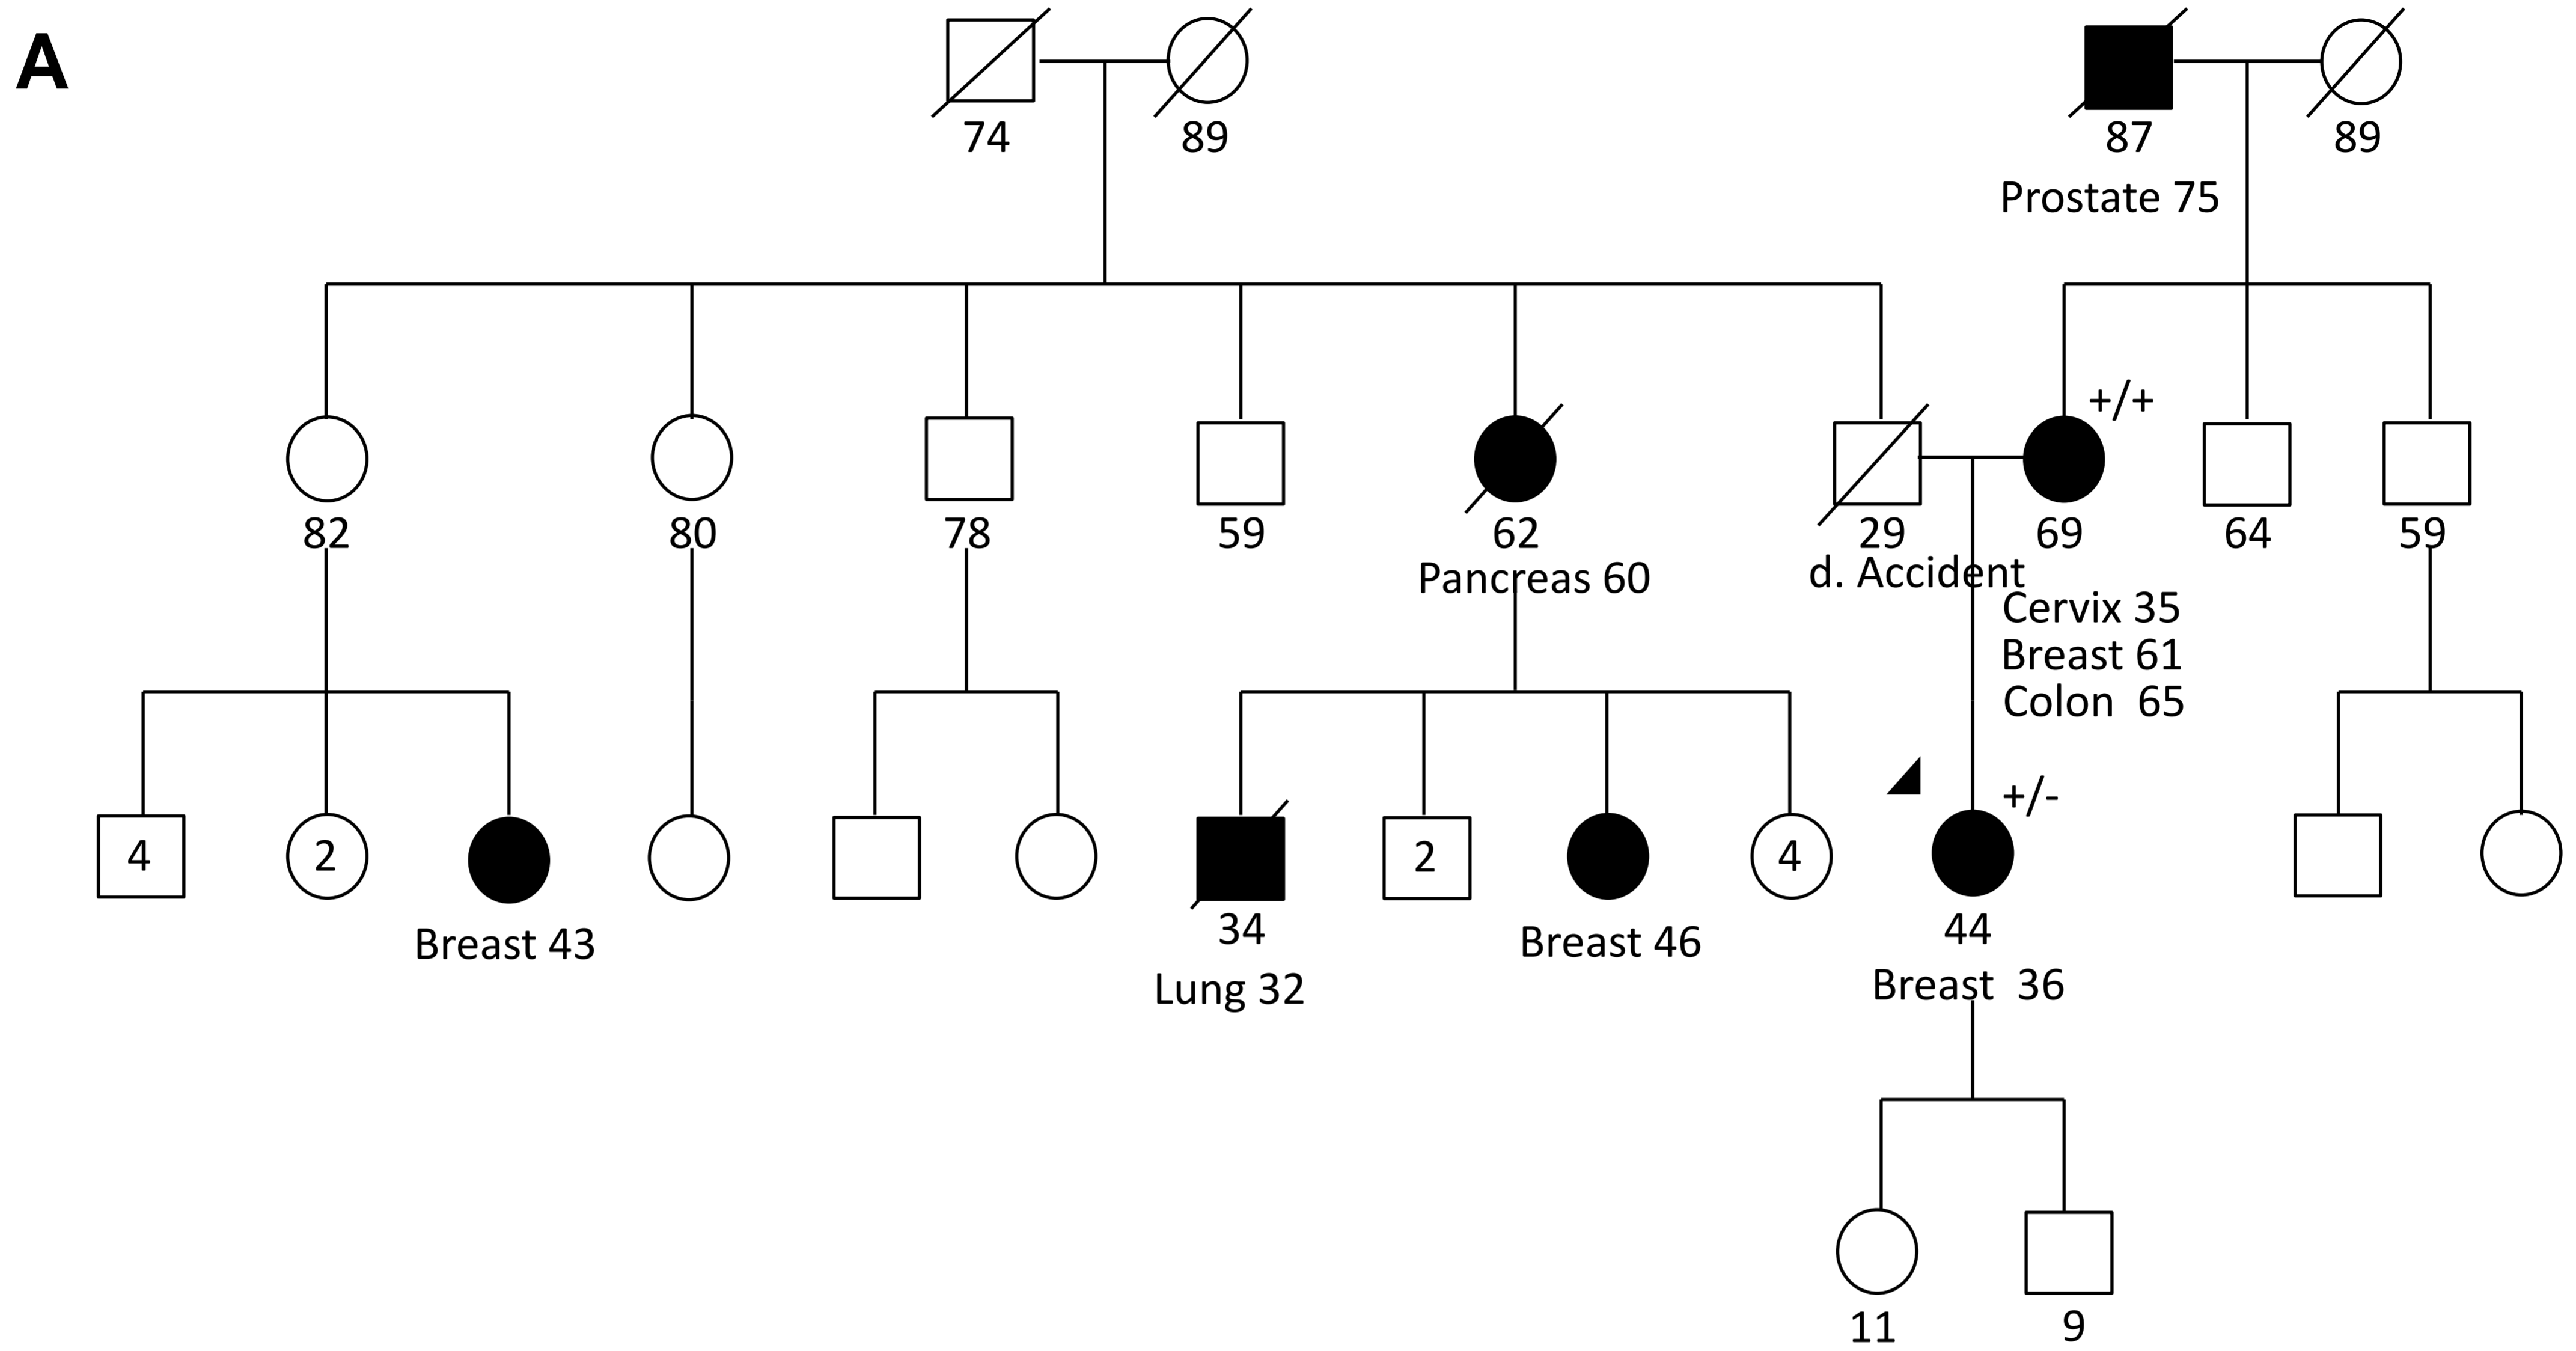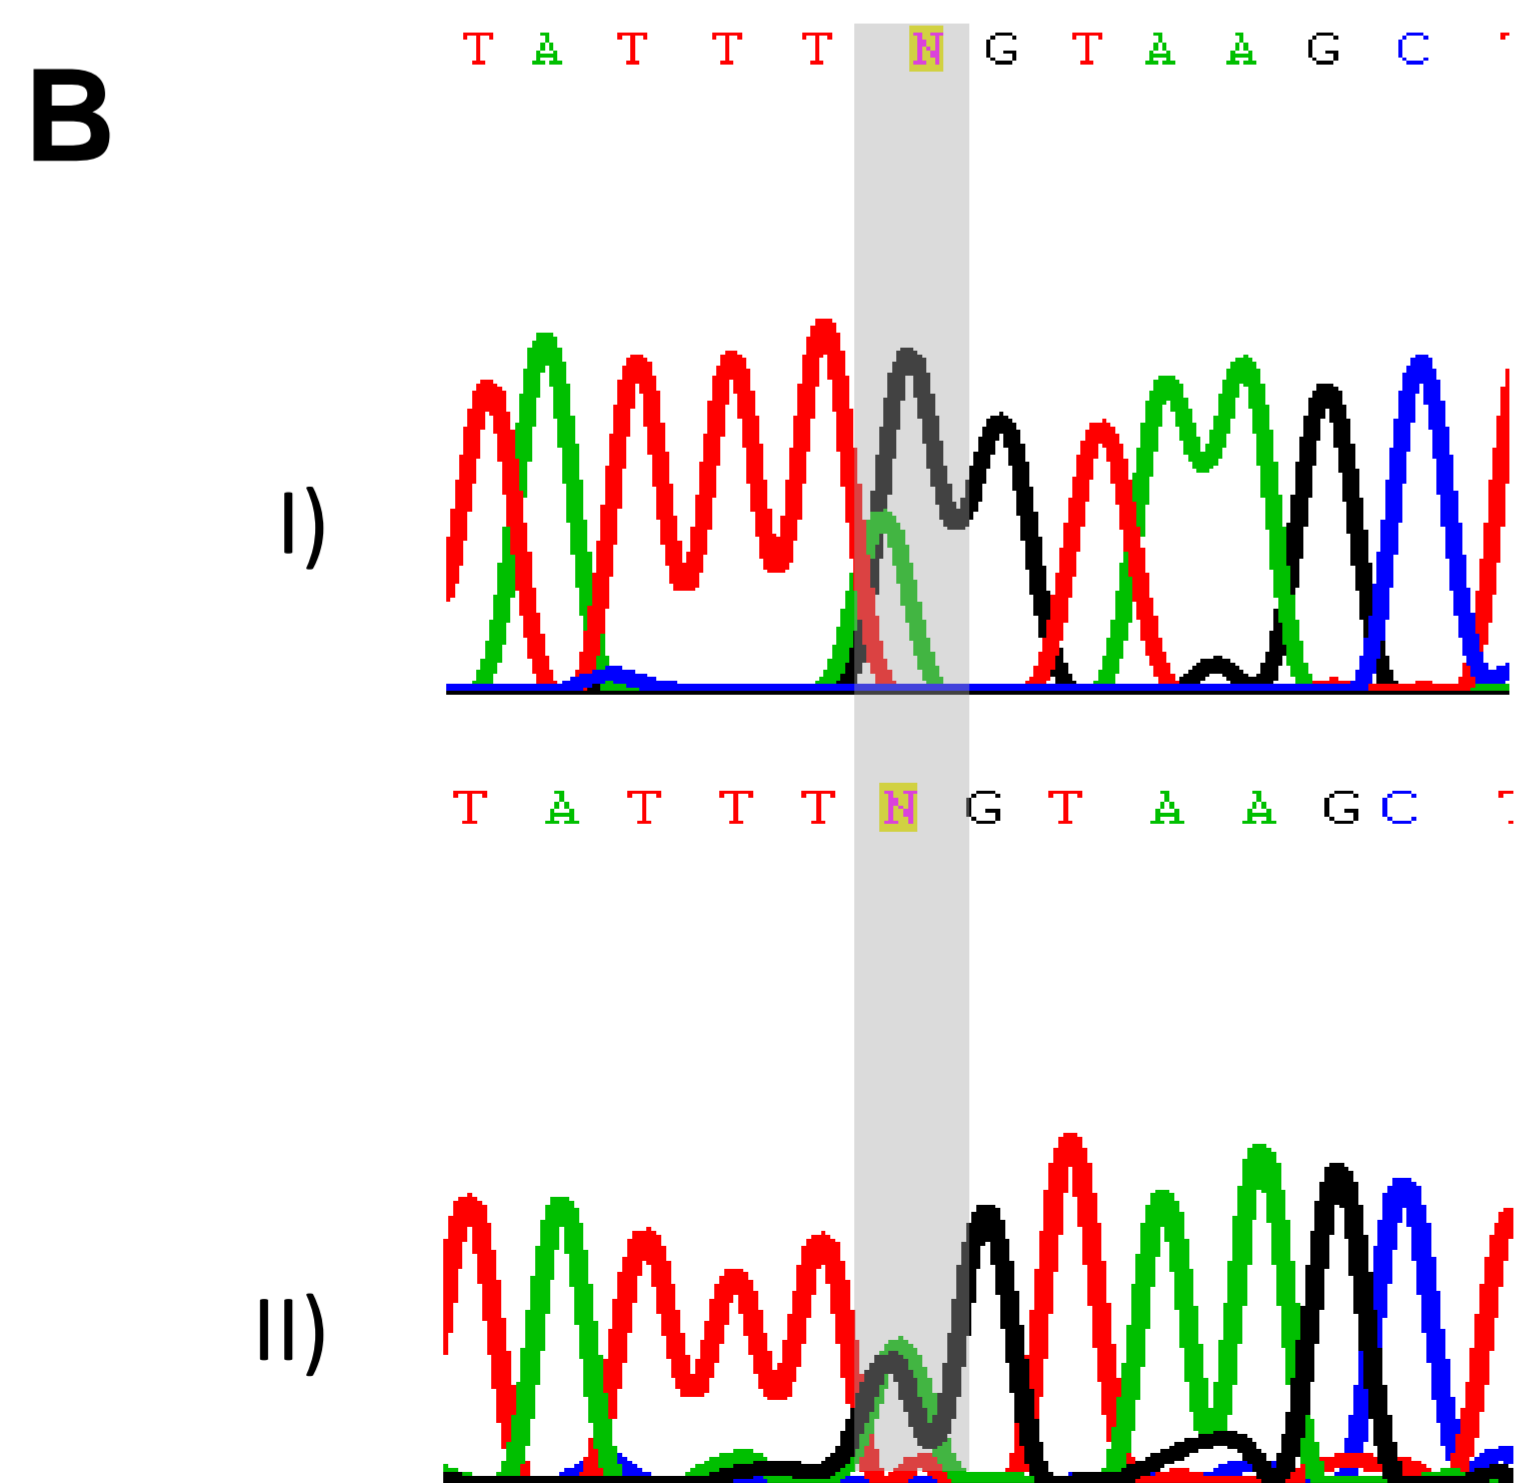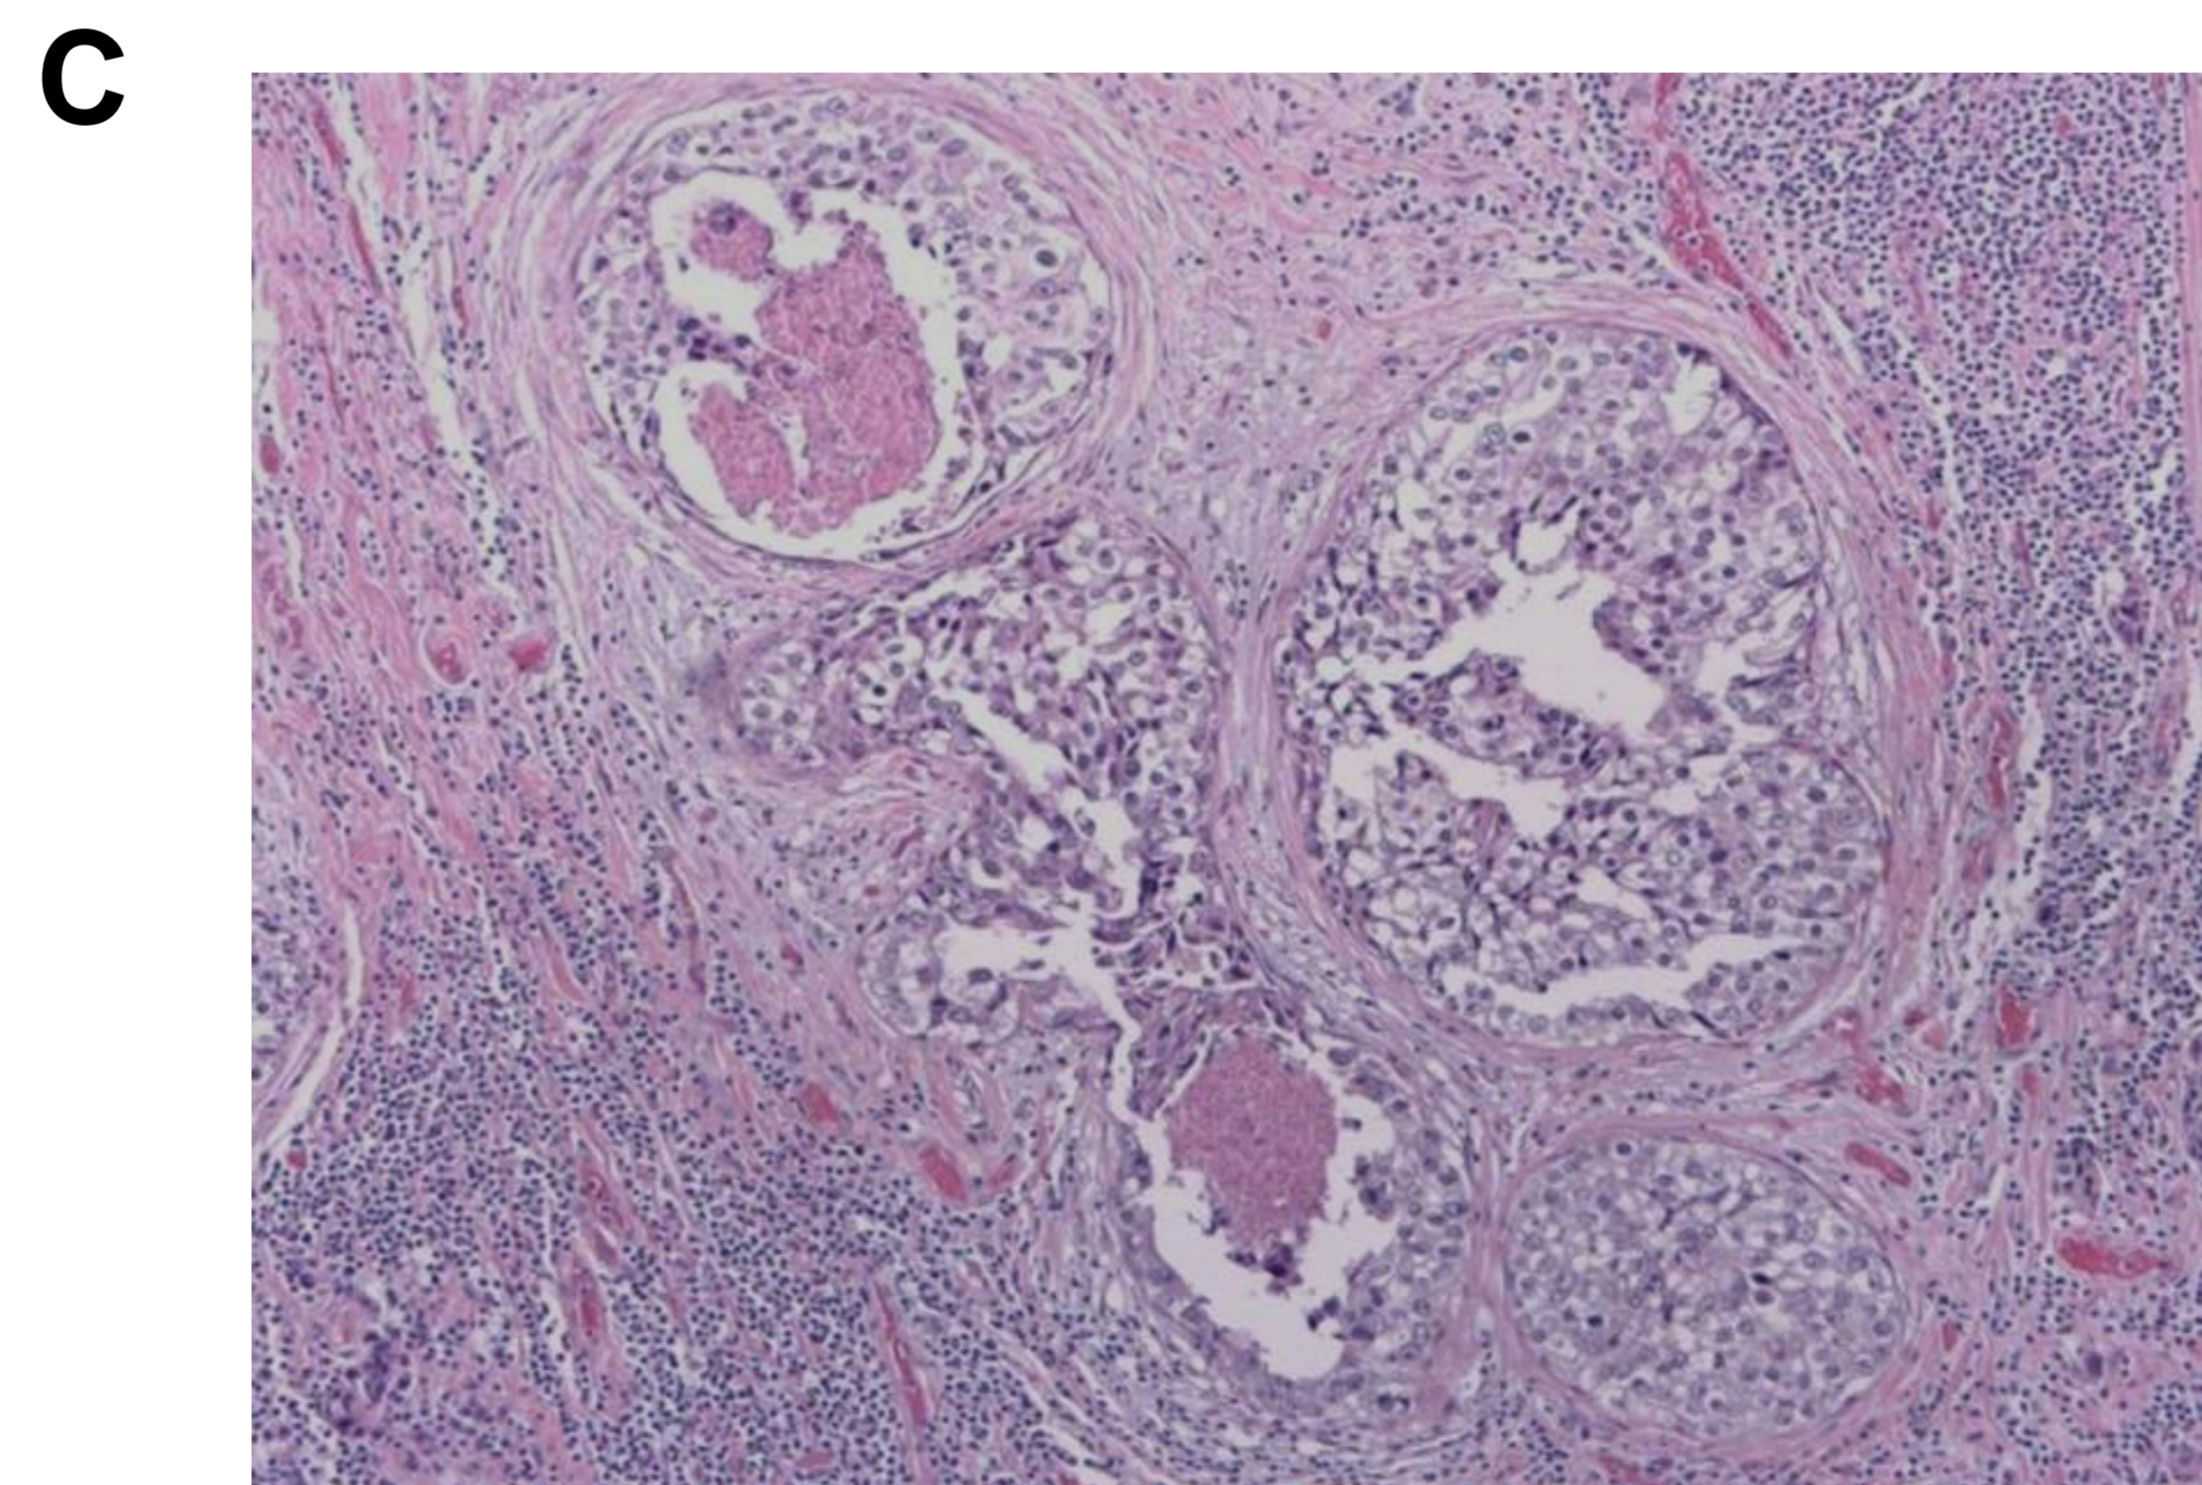

Supplement: MOESM5 [file 9673892]
